# Supplementary material for: Different association of atherogenic index of plasma with the risk of high platelet reactivity according to the presentation of acute myocardial infarction
Source: PubMed Central journal article supplement (PMC11091133; doi:10.1038/s41598-024-60999-3), 2024-05-13

**Different association of atherogenic index of plasma with the risk of high platelet reactivity according to the presentation of acute myocardial infarction**

**Running title:**

Association between AIP and HPR according to AMI

**Authors:**

Ki-Bum Won<sup>1</sup>, Hyeon Jeong Kim<sup>2</sup>, Jun Hwan Cho<sup>1</sup>, Sang Yup Lee<sup>1</sup>, Ae-Young Her<sup>3</sup>, Byeong-Keuk Kim<sup>4</sup>, Hyung Joon Joo<sup>5</sup>, Yongwhi Park<sup>6</sup>, Kiyuk Chang<sup>7</sup>, Young Bin Song<sup>8</sup>, Sung Gyun Ahn<sup>9</sup>, Jung-Won Suh<sup>10</sup>, Jung Rae Cho<sup>11</sup>, Hyo-Soo Kim<sup>12</sup>, Moo Hyun Kim<sup>13</sup>, Do-Sun Lim<sup>5</sup>, Sang-Wook Kim<sup>1</sup>, Young-Hoon Jeong<sup>1</sup>, and Eun-Seok Shin<sup>14\*</sup>

**E-mail:**

Ki-Bum Won: kbwon99@naver.com

Hyeon Jeong Kim: aneace.1@gmail.com

Jun Hwan Cho: cardio.jhcho@gmail.com

Sang Yup Lee: louisahj@gmail.com

Ae-Young Her: hermartha1@gmail.com

Byeong-Keuk Kim: kimbk@yuhs.ac

Hyung Joon Joo: drjoohj@gmail.com

Yongwhi Park: angio2000@hanmail.net

Kiyuk Chang: kiyuk@catholic.ac.kr

Young Bin Song: youngbin.song@gmail.com

Sung Gyun Ahn: sgahn@yonsei.ac.kr

Jung-Won Suh: suhjwt1@gmail.com

Jung Rae Cho: jrjoe@naver.com

Hyo-Soo Kim: hyosoo@snu.ac.kr

Moo Hyun Kim: kimmh@dau.ac.kr

Do-Sun Lim: dslmd@kumc.or.kr

Sang-Wook Kim: swkimcv@cau.ac.kr

Young-Hoon Jeong: goodoctor@naver.com

Eun-Seok Shin: sesim1989@gmail.com

**Affiliations:**

<sup>1</sup>Division of Cardiology, Chung-Ang University Gwangmyeong Medical Center, Chung-Ang University College of Medicine, Gwangmyeong, South Korea

<sup>2</sup>Division of Cardiology, Busan Veterance Hospital, Busan, South Korea

<sup>3</sup>Division of Cardiology, Kangwon National University School of Medicine, Chuncheon, South Korea.

<sup>4</sup>Division of Cardiology, Severance Cardiovascular Hospital, Yonsei University College of Medicine, Seoul, South Korea

<sup>5</sup>Division of Cardiology, Cardiovascular Center, Korea University Anam Hospital, Korea University College of Medicine, Seoul, South Korea

<sup>6</sup>Division of Cardiology, Gyeongsang National University Changwon Hospital, Gyeongsang National University School of Medicine, Changwon, South Korea

<sup>7</sup>Division of Cardiology, Seoul St. Mary's Hospital, College of Medicine, Catholic University of Korea, Seoul, South Korea

<sup>8</sup>Division of Cardiology, Samsung Medical Center, Sungkyunkwan University School of Medicine, Seoul, South Korea

<sup>9</sup>Division of Cardiology, Yonsei University Wonju Severance Christian Hospital, Wonju, South Korea

<sup>10</sup>Division of Cardiology, Seoul National University Bundang Hospital, Seongnam, South Korea

<sup>11</sup>Division of Cardiology, Kangnam Sacred Heart Hospital, Hallym University College of Medicine, Seoul, South Korea

<sup>12</sup>Division of Cardiology, Seoul National University Hospital, Seoul, South Korea

<sup>13</sup>Division of Cardiology, Dong-A University Hospital, Busan, South Korea

<sup>14</sup>Division of Cardiology, Ulsan University Hospital, University of Ulsan College of Medicine, Ulsan,  
South Korea

**\*Address for correspondence:**

Eun-Seok Shin, MD, PhD

Division of Cardiology, Ulsan University Hospital, University of Ulsan College of Medicine,

877 Bangeojinsunhwando-ro, Dong-gu, Ulsan, 44033, South Korea

Email: [sesim1989@gmail.com](mailto:sesim1989@gmail.com)

**Supplementary table 1.** Baseline characteristics according to HPR and AIP status in non-AMI and AMI patients

|                               | Non-HPR +<br>Low AIP | Non-HPR +<br>High AIP | HPR +<br>Low AIP | HPR +<br>High AIP | P      |
|-------------------------------|----------------------|-----------------------|------------------|-------------------|--------|
| Non-AMI (n = 7599)            | n = 3067             | n = 1971              | n = 1654         | n = 907           |        |
| Age, years                    | 64.3 ± 10.0          | 61.5 ± 10.4           | 67.6 ± 9.5       | 65.8 ± 9.8        | <0.001 |
| Male                          | 2181 (71.1)          | 1490 (75.6)           | 899 (54.4)       | 490 (54.0)        | <0.001 |
| LVEF, %                       | 60.8 ± 10.2          | 60.9 ± 9.6            | 60.7 ± 10.1      | 61.3 ± 9.2        | 0.579  |
| Hypertension                  | 1838 (59.9)          | 1222 (62.0)           | 1148 (69.4)      | 617 (68.0)        | <0.001 |
| Diabetes mellitus             | 996 (32.5)           | 758 (38.5)            | 605 (36.6)       | 413 (45.5)        | <0.001 |
| Dyslipidemia                  | 1682 (54.8)          | 1727 (87.6)           | 913 (55.2)       | 789 (87.0)        | <0.001 |
| Obesity                       | 1211 (39.5)          | 1077 (54.6)           | 680 (41.1)       | 484 (53.4)        | <0.001 |
| Smoking                       | 717 (23.4)           | 646 (32.8)            | 246 (14.9)       | 182 (20.1)        | <0.001 |
| Chronic kidney disease        | 489 (15.9)           | 377 (19.1)            | 389 (23.5)       | 254 (28.0)        | <0.001 |
| Peripheral artery disease     | 290 (9.5)            | 197 (10.0)            | 193 (11.7)       | 122 (13.5)        | 0.002  |
| Previous PCI                  | 482 (15.7)           | 286 (14.5)            | 254 (15.4)       | 129 (14.2)        | 0.562  |
| Previous CVA                  | 224 (7.3)            | 126 (6.4)             | 119 (7.2)        | 57 (6.3)          | 0.510  |
| Multivessel disease           | 1067 (34.8)          | 760 (38.6)            | 591 (35.7)       | 394 (43.4)        | <0.001 |
| Bifurcation lesion            | 343 (11.2)           | 221 (11.2)            | 189 (11.4)       | 115 (12.7)        | 0.643  |
| CTO lesion                    | 228 (7.4)            | 170 (8.6)             | 106 (6.4)        | 53 (5.8)          | 0.019  |
| Number of stents              | 1.6 ± 0.8            | 1.6 ± 0.8             | 1.6 ± 0.8        | 1.7 ± 0.8         | 0.151  |
| Length of stent, mm           | 35.5 ± 22.9          | 36.1 ± 23.2           | 34.8 ± 22.9      | 37.5 ± 23.9       | 0.031  |
| Minimal diameter of stent, mm | 2.99 ± 0.43          | 3.02 ± 0.44           | 2.99 ± 0.41      | 2.97 ± 0.41       | 0.014  |
| Beta blocker                  | 1513 (49.3)          | 1027 (52.1)           | 856 (51.8)       | 479 (52.8)        | 0.114  |
| Angiotensin blockade          | 1617 (52.7)          | 1076 (54.6)           | 918 (55.5)       | 502 (55.3)        | 0.220  |

|                               |             |             |             |             |        |
|-------------------------------|-------------|-------------|-------------|-------------|--------|
| Calcium channel blocker       | 826 (26.9)  | 558 (28.3)  | 471 (28.5)  | 239 (26.4)  | 0.471  |
| Statin                        | 2669 (87.0) | 1764 (89.5) | 1461 (88.3) | 802 (88.4)  | 0.064  |
| AMI (n = 3136)                | n = 1308    | n = 736     | n = 725     | n = 367     |        |
| Age, years                    | 64.4 ± 11.9 | 59.0 ± 12.9 | 68.5 ± 11.0 | 64.8 ± 12.1 | <0.001 |
| Male                          | 951 (72.7)  | 590 (80.2)  | 416 (57.4)  | 235 (64.0)  | <0.001 |
| LVEF, %                       | 54.2 ± 10.6 | 55.7 ± 9.5  | 53.2 ± 11.3 | 54.7 ± 10.4 | <0.001 |
| Hypertension                  | 664 (50.8)  | 369 (50.1)  | 412 (56.8)  | 207 (56.4)  | 0.012  |
| Diabetes mellitus             | 348 (26.6)  | 207 (28.1)  | 225 (31.0)  | 162 (44.1)  | <0.001 |
| Dyslipidemia                  | 726 (55.5)  | 680 (92.4)  | 404 (55.7)  | 333 (90.7)  | <0.001 |
| Obesity                       | 404 (30.9)  | 362 (49.2)  | 188 (25.9)  | 144 (39.2)  | <0.001 |
| Smoking                       | 511 (39.1)  | 353 (48.0)  | 212 (29.2)  | 154 (42.0)  | <0.001 |
| Chronic kidney disease        | 259 (19.8)  | 123 (16.7)  | 207 (28.6)  | 126 (34.3)  | <0.001 |
| Peripheral artery disease     | 194 (14.8)  | 113 (15.4)  | 134 (18.5)  | 62 (16.9)   | 0.166  |
| Previous PCI                  | 127 (9.7)   | 61 (8.3)    | 75 (10.3)   | 31 (8.4)    | 0.499  |
| Previous CVA                  | 78 (6.0)    | 43 (5.8)    | 65 (9.0)    | 33 (9.0)    | 0.017  |
| Multivessel disease           | 572 (43.7)  | 321 (43.6)  | 374 (51.6)  | 165 (45.0)  | 0.004  |
| Bifurcation lesion            | 156 (11.9)  | 74 (10.1)   | 115 (15.9)  | 45 (12.3)   | 0.007  |
| CTO lesion                    | 80 (6.1)    | 40 (5.4)    | 42 (5.8)    | 28 (7.6)    | 0.534  |
| Number of stents              | 1.6 ± 0.8   | 1.6 ± 0.7   | 1.6 ± 0.8   | 1.6 ± 0.7   | 0.388  |
| Length of stent, mm           | 35.7 ± 21.0 | 36.4 ± 21.6 | 37.3 ± 22.5 | 36.2 ± 21.4 | 0.459  |
| Minimal diameter of stent, mm | 3.04 ± 0.45 | 3.13 ± 0.49 | 3.03 ± 0.46 | 3.07 ± 0.47 | <0.001 |
| Beta blocker                  | 949 (72.6)  | 581 (78.9)  | 537 (74.1)  | 263 (71.7)  | 0.008  |
| Angiotensin blockade          | 889 (68.0)  | 521 (70.8)  | 536 (73.9)  | 257 (70.0)  | 0.044  |
| Calcium channel blocker       | 201 (15.4)  | 111 (15.1)  | 116 (16.0)  | 59 (16.1)   | 0.951  |
| Statin                        | 1173 (89.7) | 683 (92.8)  | 648 (89.4)  | 322 (87.7)  | 0.029  |

Values are given as absolute number (%).

*AIP* atherogenic index of plasma; *AMI* acute myocardial infarction; *CVA* cerebrovascular accident; *HPR* high platelet reactivity; *MI* myocardial infarction

**Supplementary table 2.** C statics for evaluating the risk of primary endpoint regarding HPR alone and consecutively added models of clinical risk factors, HF, and AIP in non-AMI and AMI patients

| Model                                                                                                                 | C-statics | P compared with model 1<br>(NRI P/ IDI P) | P compared with model 2<br>(NRI P/ IDI P) | P compared with model 3<br>(NRI P/ IDI P) |
|-----------------------------------------------------------------------------------------------------------------------|-----------|-------------------------------------------|-------------------------------------------|-------------------------------------------|
| <b>Non-AMI</b>                                                                                                        |           |                                           |                                           |                                           |
| Model 1: HPR only                                                                                                     | 0.545     | –                                         | –                                         | –                                         |
| Model 2: Model 1 + clinical risk factors of age, hypertension, diabetes, obesity, smoking, and chronic kidney disease | 0.691     | <0.001<br>(<0.001/<0.001)                 | –                                         | –                                         |
| Model 3: Model 2 + HF                                                                                                 | 0.702     | <0.001<br>(<0.001/<0.001)                 | 0.059<br>(0.065/0.005)                    | –                                         |
| Model 4: Model 3 + high AIP                                                                                           | 0.702     | <0.001<br>(<0.001/<0.001)                 | 0.068<br>(0.136/0.004)                    | 0.760<br>(0.235/0.718)                    |
| <b>AMI</b>                                                                                                            |           |                                           |                                           |                                           |
| Model 1: HPR only                                                                                                     | 0.547     | –                                         | –                                         | –                                         |
| Model 2: Model 1 + clinical risk factors of age, hypertension, diabetes, obesity, smoking, and chronic kidney disease | 0.685     | <0.001<br>(<0.001/<0.001)                 | –                                         | –                                         |
| Model 3: Model 2 + HF                                                                                                 | 0.705     | <0.001<br>(<0.001/<0.001)                 | 0.034<br>(0.053/<0.001)                   | –                                         |
| Model 4: Model 3 + high AIP                                                                                           | 0.705     | <0.001                                    | 0.045                                     | 0.958                                     |

|  |  |                 |                |               |
|--|--|-----------------|----------------|---------------|
|  |  | (<0.001/<0.001) | (0.059/<0.001) | (0.571/0.226) |
|--|--|-----------------|----------------|---------------|

HF was defined as a reduced LVEF less than 40%.

*AIP* atherogenic index of plasma; *AMI* acute myocardial infarction; *HF* heart failure; *HPR* high platelet reactivity; *IDI* integrated discrimination index; *LVEF* left ventricular ejection fraction; *NRI* net reclassification index



Supplementary figure 1. Association between BMI and AIP in non-AMI and AMI patients

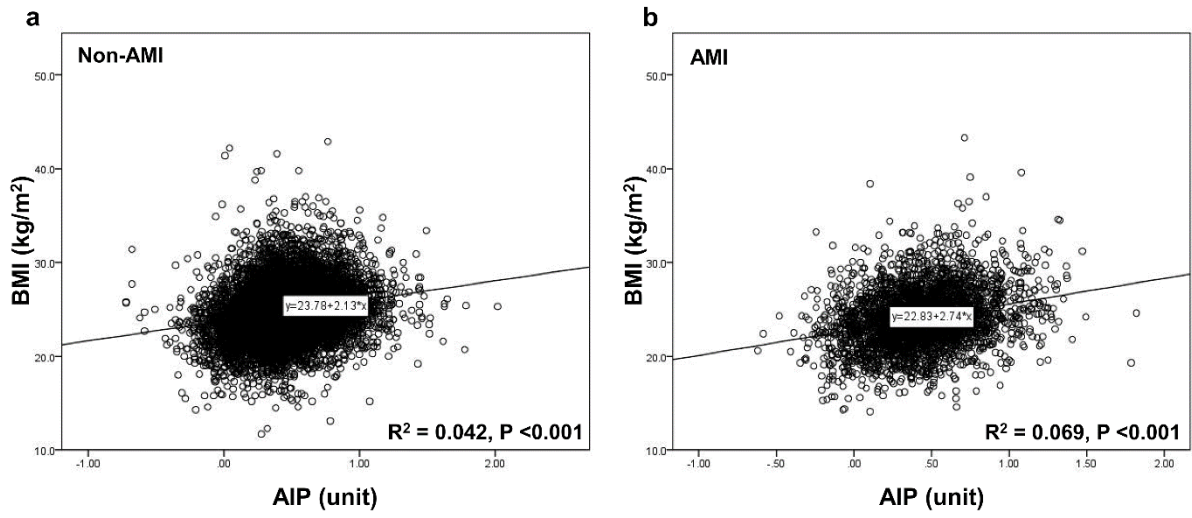

Supplement: 41598_2024_60999_MOESM1_ESM.pdf [file 41598_2024_60999_MOESM1_ESM.pdf]
